# Supplementary material for: Memristive properties and synaptic plasticity in substituted pyridinium iodobismuthates
Source: Royal Society of Chemistry journal article supplement (doi:10.1039/d4dt01946f), 2024-01-01
Supplement: d4dt01946f5.pdf [file d4dt01946f5.pdf]

## **Supporting Information**

### **Memristive properties and synaptic plasticity in substituted pyridinium iodobismuthates**

G. Abdi,<sup>1\*</sup> T. Mazur,<sup>1</sup> E. Kowalewska,<sup>1</sup> A. Sławek,<sup>1</sup> Mateusz Marzec,<sup>1</sup> K. Szaciłowski<sup>1,2\*</sup>

<sup>1</sup>AGH University of Krakow, Academic Centre for Materials and Nanotechnology, al. Mickiewicza 30, 30-059 Kraków, Poland

<sup>2</sup>Unconventional Computing Lab, University of the West of England, Bristol BS16 1QY, United Kingdom

\*corresponding authors: [agisya@agh.edu.pl](mailto:agisya@agh.edu.pl), [szacilow@agh.edu.pl](mailto:szacilow@agh.edu.pl),  
[konrad.szacilowski@uwe.ac.uk](mailto:konrad.szacilowski@uwe.ac.uk)

**KEYWORDS.** Lead-free perovskite, neuromorphic electronics, pyridinium-based bismuth complexes, memristors.

**Table S1.** Extracted parameters from the fitted experimental data to the introduced model for the fabricated devices from pyridinium-based bismuthates samples as Tauc-Lorentz layer.

| Name of the absorber layer | Thickness of Roughness | Thickness of absorber layer | n                                                                | k                                                                 |
|----------------------------|------------------------|-----------------------------|------------------------------------------------------------------|-------------------------------------------------------------------|
| 4-AmpyBiI <sub>3</sub>     | 9.79 nm                | 202.78 nm                   | 2.13                                                             | 0.0204                                                            |
| 4-MepyBiI <sub>3</sub>     | 13.98 nm               | 150.79 nm                   | 2.33                                                             | 0.0468                                                            |
| 4-DmapyBiI <sub>3</sub>    | 20.49 nm               | 164.06.45 nm                | 2.1170                                                           | 0.00068                                                           |
| 4-CNpyBiI <sub>3</sub>     | -                      | 169.16                      | 1.5648<br>(n <sub>xy</sub> = 1.6358;<br>n <sub>z</sub> = 1.4226) | 0.38812<br>(k <sub>xy</sub> = 0.3363;<br>k <sub>z</sub> = 0.4917) |

**Table S2.** Effect of the surface area of the electrode on LRS (ON) and HRS (OFF) states.<sup>a</sup>

| Entry                  | Surface area/1 mm <sup>2</sup> |                  | Surface area/9 mm <sup>2</sup> |                  | Ratio ON <sup>b</sup> /ON <sup>c</sup> | Ratio OFF <sup>b</sup> /OFF <sup>c</sup> |
|------------------------|--------------------------------|------------------|--------------------------------|------------------|----------------------------------------|------------------------------------------|
|                        | Current (mA)/ON                | Current (mA)/OFF | Current (mA)/ON                | Current (mA)/OFF |                                        |                                          |
| 4-CNpyBiI <sub>3</sub> | 2.58±0.1                       | 1.46±0.1         | 3.00±0.1                       | 2.03±0.2         | 1.16                                   | 1.39                                     |
| 4-MepyBiI <sub>3</sub> | 1.92±0.1                       | 1.42±0.07        | 3.08±0.2                       | 1.84±0.1         | 1.6                                    | 1.29                                     |
| 4-AmpyBiI <sub>3</sub> | 2.44±0.1                       | 1.94±0.3         | 5.53±0.03                      | 3.24±0.4         | 2.27                                   | 1.64                                     |

<sup>a</sup>The average amount of 5 different measured devices.

<sup>b</sup>surface area 1mm<sup>2</sup>; <sup>c</sup>surface area 9mm<sup>2</sup>

**Table S3.** Rectification factor for devices with different surface area of electrode.<sup>a</sup>

| Entry                  | Surface area/1 mm <sup>2</sup> |                         | Ratio | Surface area/9 mm <sup>2</sup> |                      | Ratio |
|------------------------|--------------------------------|-------------------------|-------|--------------------------------|----------------------|-------|
|                        | Current (mA) at +2V            | Current (mA) at -2V     |       | Current (mA) at +2V            | Current (mA) at -2V  |       |
| 4-CNpyBiI <sub>3</sub> | 30.74±1                        | 39.9±0.5                | 1.3   | 24.47±1                        | 33.03±0.5            | 1.35  |
| 4-MepyBiI <sub>3</sub> | 38.34±0.8                      | 48.02±1                 | 1.25  | 31.47±0.5                      | 39.05±1              | 1.24  |
| 4-AmpyBiI <sub>3</sub> | 78.65±1 <sup>b</sup>           | 104.24±1.5 <sup>c</sup> | 1.33  | 75.48±1.5 <sup>b</sup>         | 83.92±1 <sup>c</sup> | 1.11  |

<sup>a</sup>The average amount of 5 different measured devices.

<sup>b</sup>measured at +4V; <sup>c</sup>measured at -4V

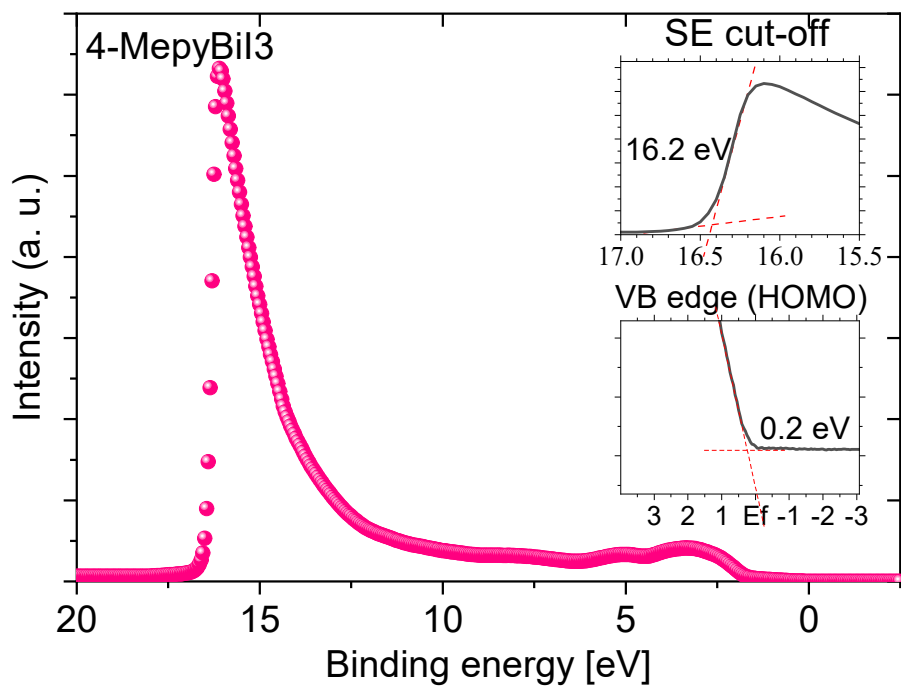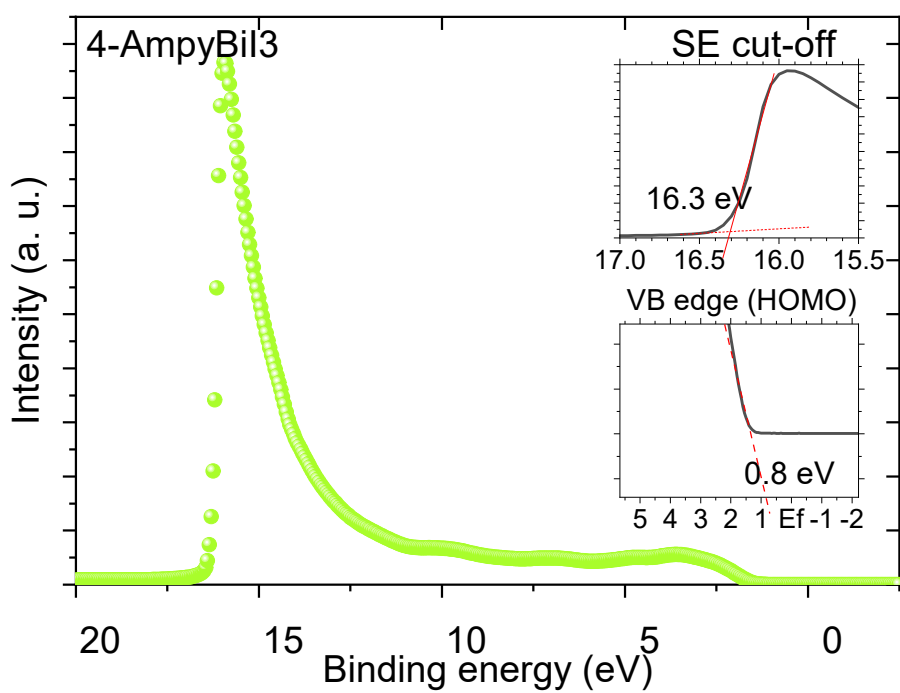

**Figure S1.** UPS spectra of thin films on ITO glasses a) 4-MetpyBiI<sub>3</sub> b) 4-AmpyBiI<sub>3</sub>

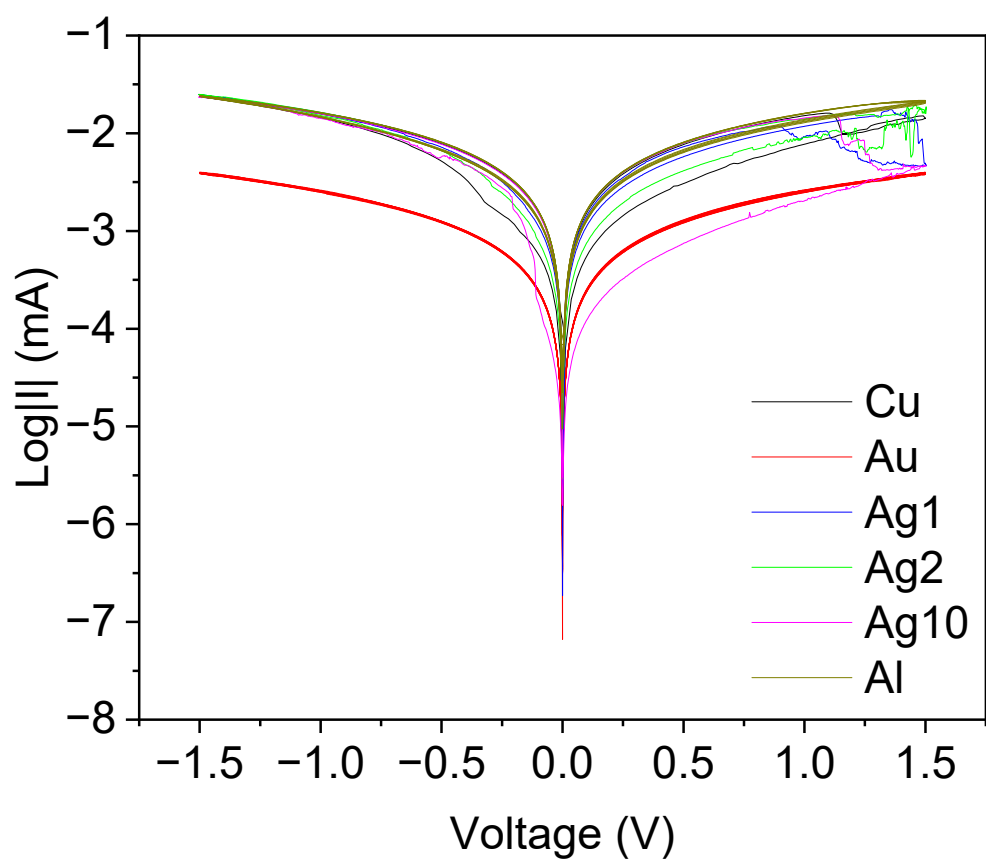

**Figure S2.** 4-CNpyBiI<sub>3</sub>/ITO glasses with different metal electrodes as top electrode.

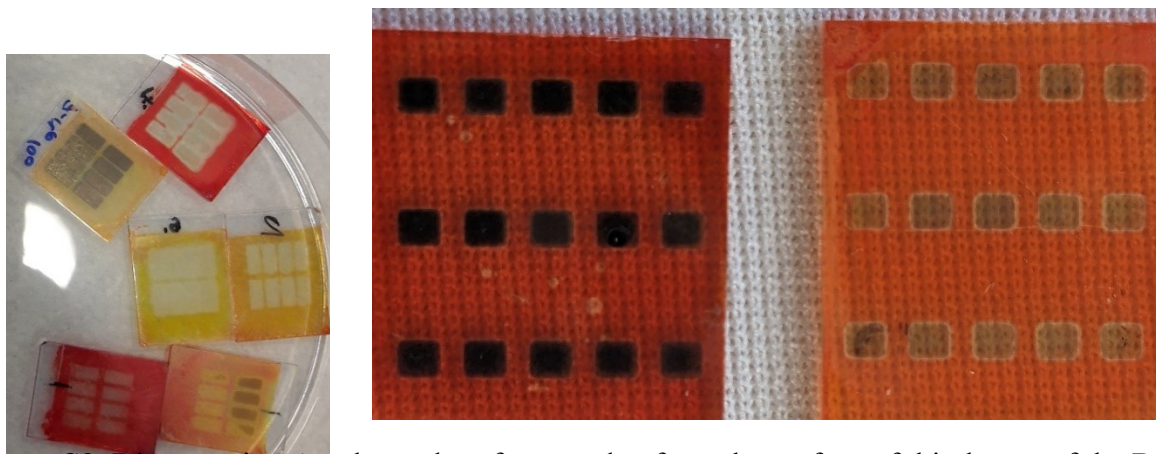

**Figure S3.** Disappearing Ag electrodes after one day from the surface of thin layers of the Bi-complexes on ITO/glasses.

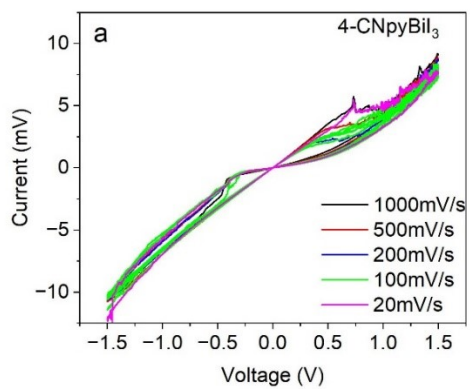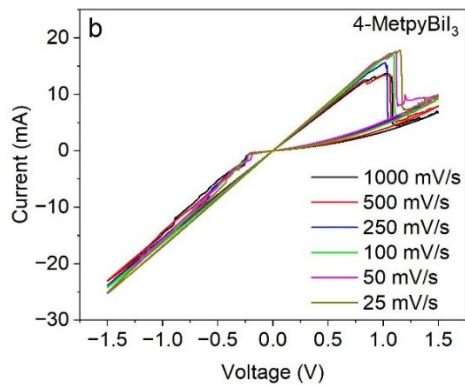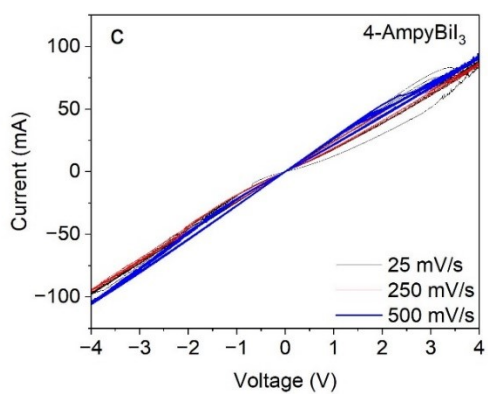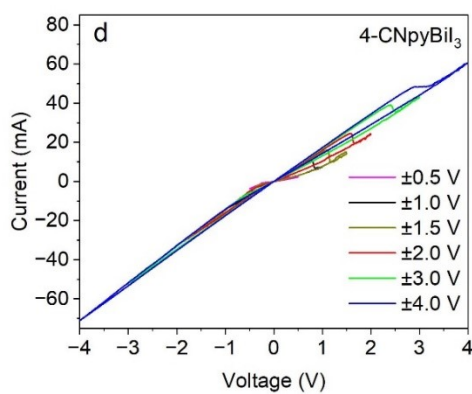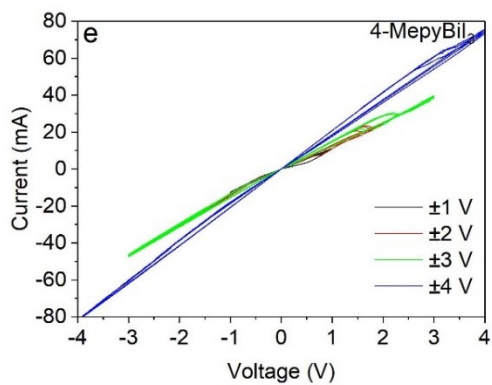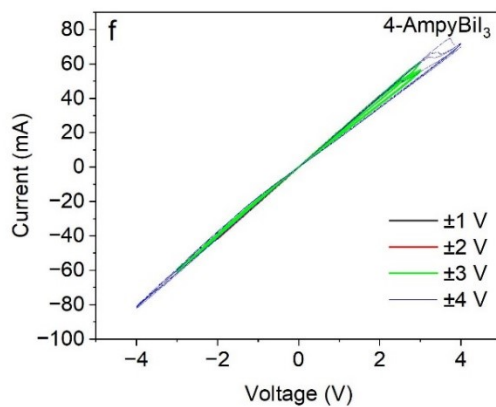

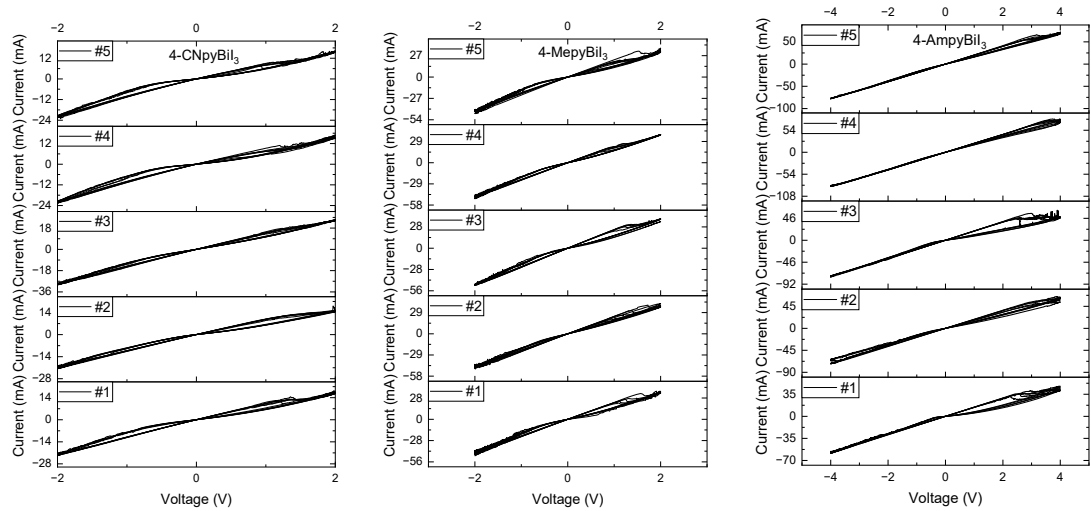

**Figure S4.** Scan rates a) Cu/4-CNpyBi<sub>3</sub>/ITO b) Cu/4-MepyBi<sub>3</sub>/ITO c) Cu/4-AmpyBi<sub>3</sub>/ITO. Voltage ranges d) Cu/4-CNpyBi<sub>3</sub>/ITO e) Cu/4-MepyBi<sub>3</sub>/ITO f) Cu/4-AmpyBi<sub>3</sub>/ITO in different voltages range. Device-to-device reproducibility for 5 different batches of samples is also shown in bottom panel.

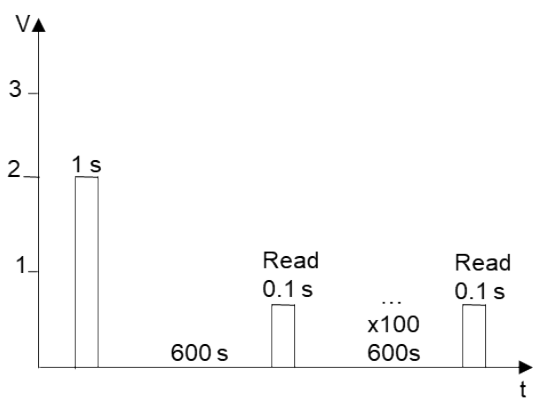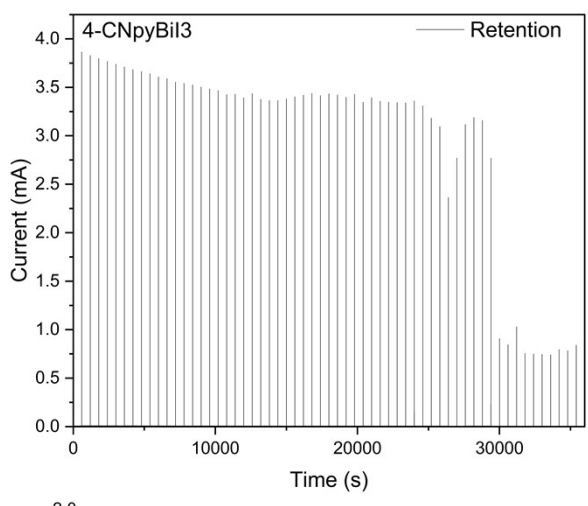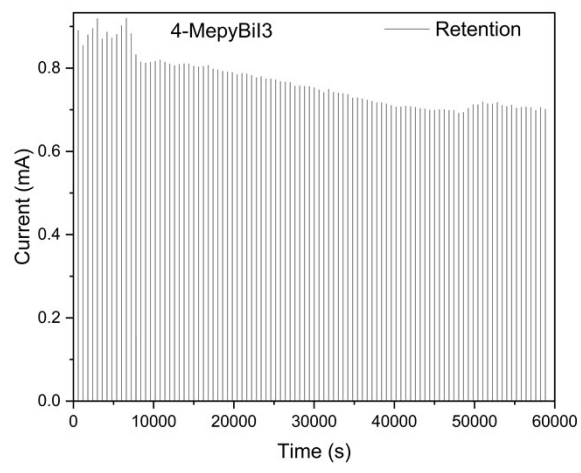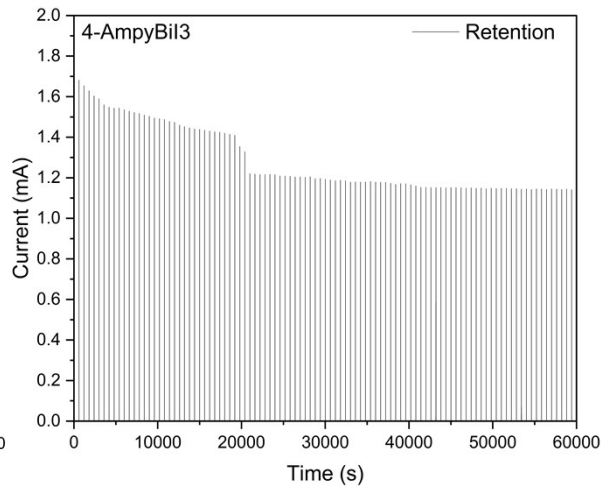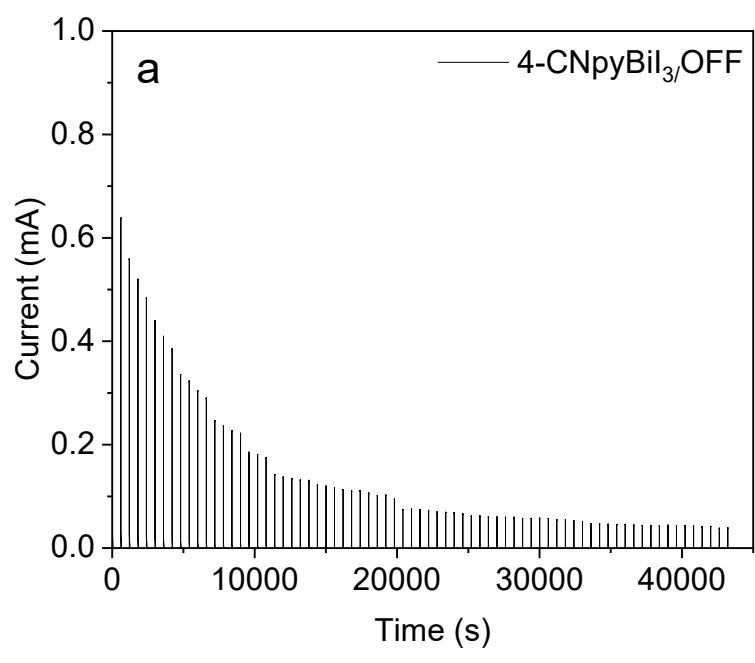

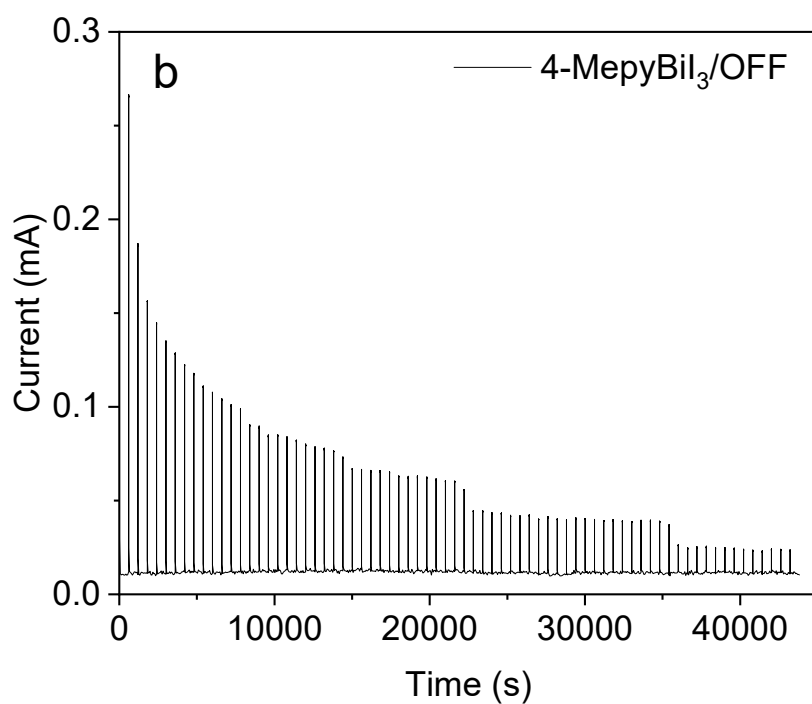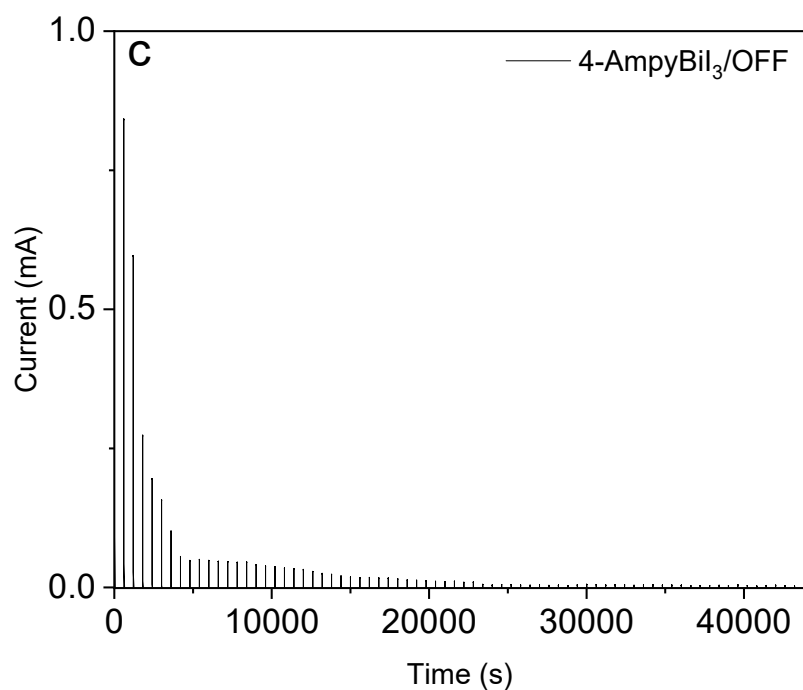

**Figure S5.** The Retention measurements of on and off states in 4-CNpyBi<sub>3</sub> and 4-MepyBi<sub>3</sub> at  $\pm 2$  V as set and reset voltages. Retention measurements of the devices made of 4-AmpyBi<sub>3</sub>,  $\pm 4$  V was chosen as the set and rest voltages and the read point was + 0.2 V. The width of all pulse was 0.1 s.



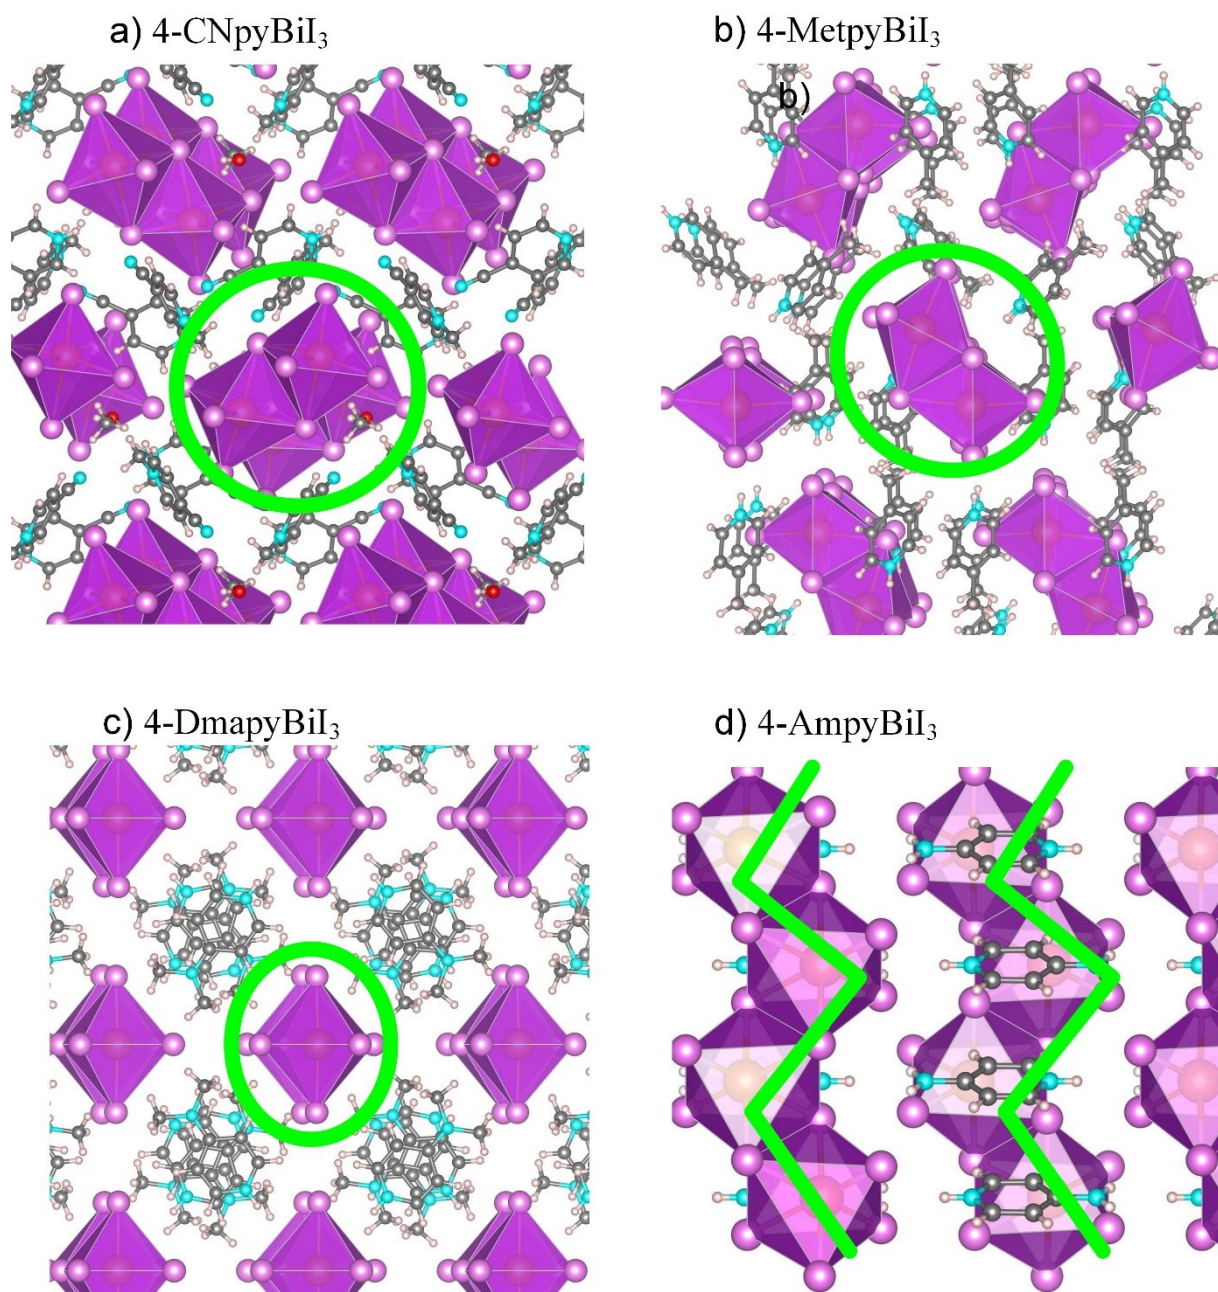

**Figure S6.** Representation of 0D a) 4-CNpyBiI<sub>3</sub> and b) 4-MepyBiI<sub>3</sub> c) 4-DmapyBiI<sub>3</sub> and 1D d) and 4-AmpyBiI<sub>3</sub> of ionic fragments of Bi-I and void shapes.

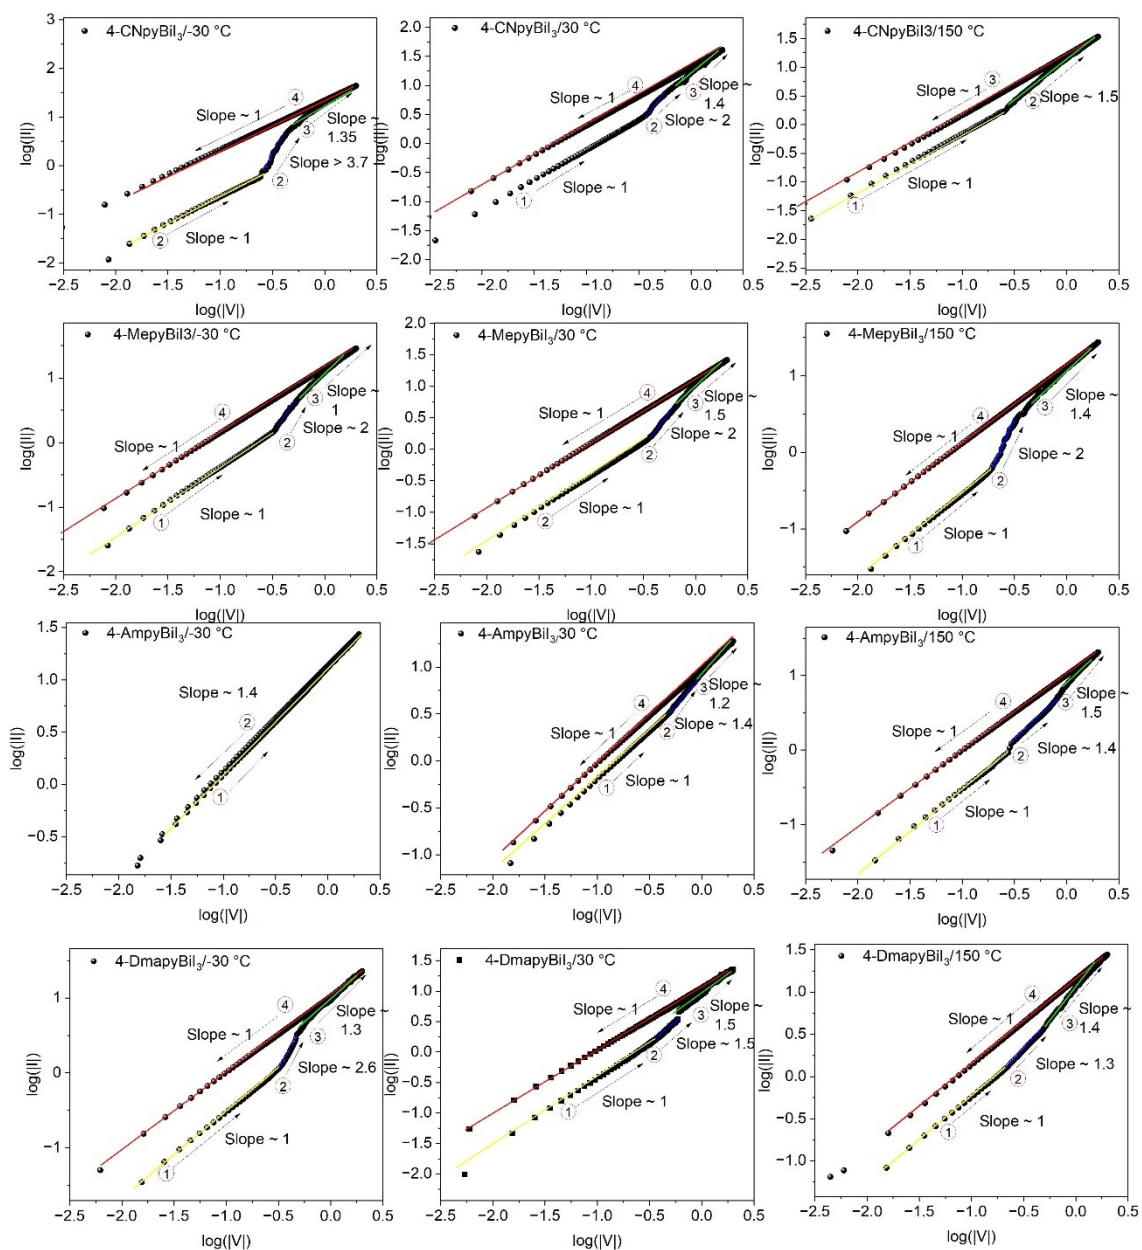

**Figure S7.** Double logarithmic scales of IV values of 4-CNpyBi<sub>3</sub>, 4-MepyBi<sub>3</sub>, 4-DmapyBi<sub>3</sub> and 4-AmpyBi<sub>3</sub> in SET process.

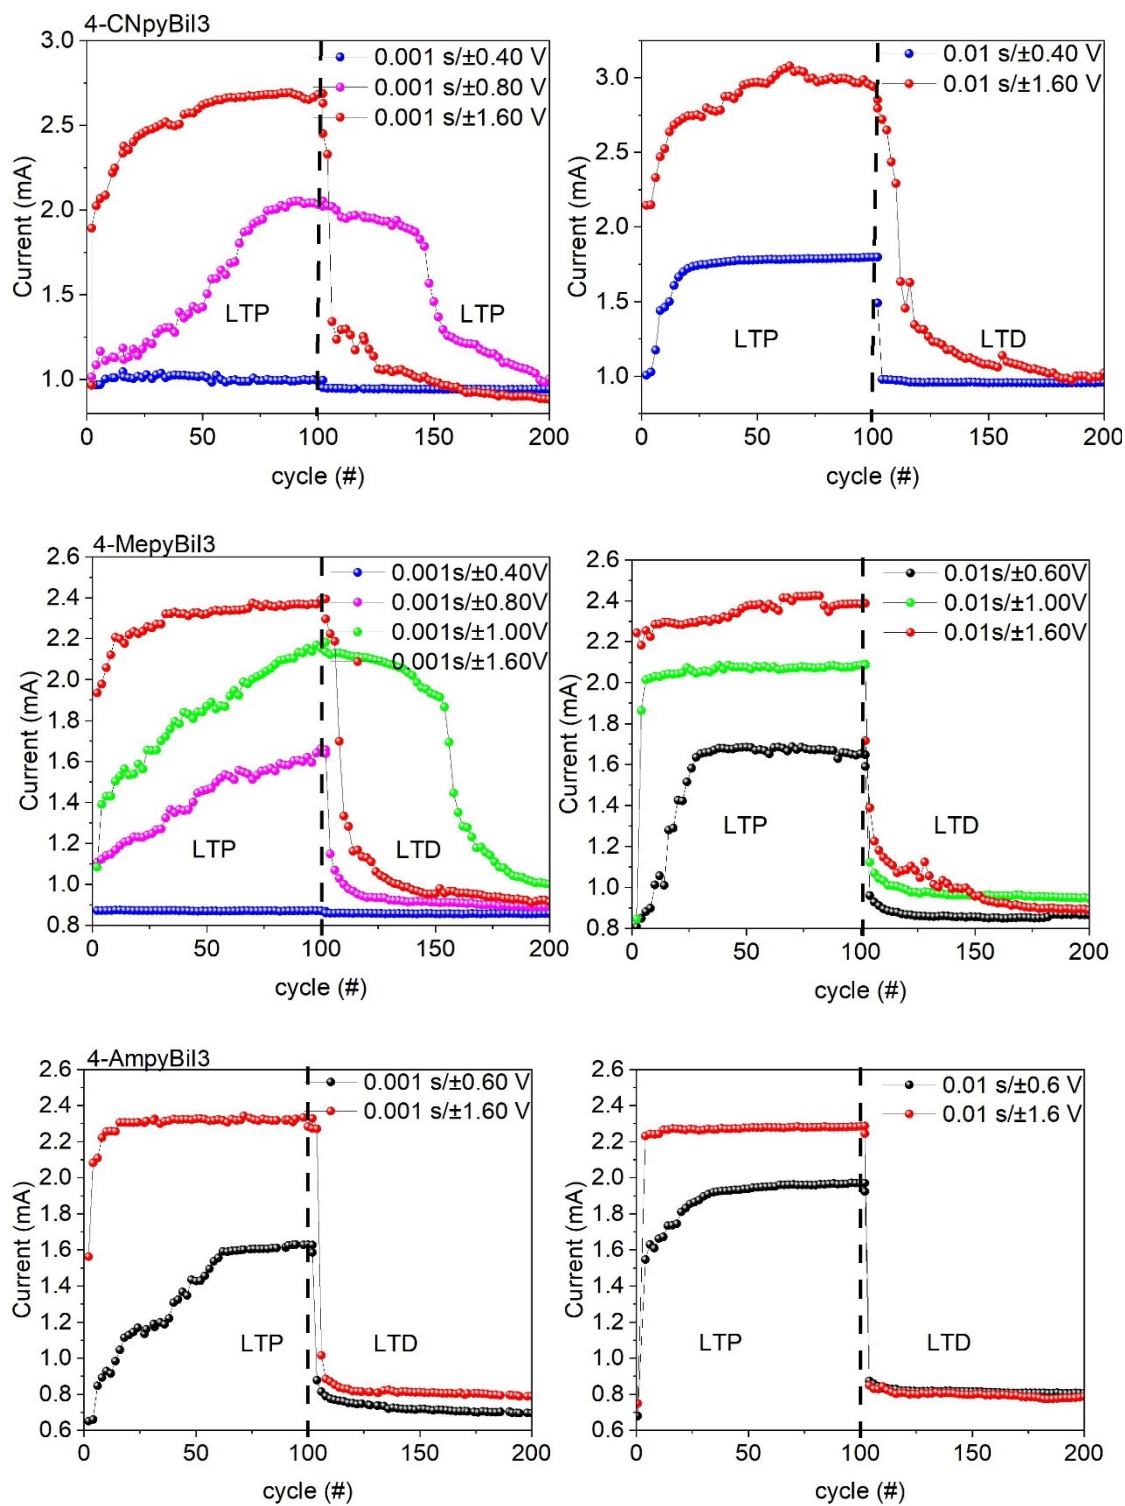

**Figure S8.** LTP and LTD for prepared devices with different pulse sequences with different width (0.001 s or 0.01 s) and amplitude between 0.4 V -1.6 V).

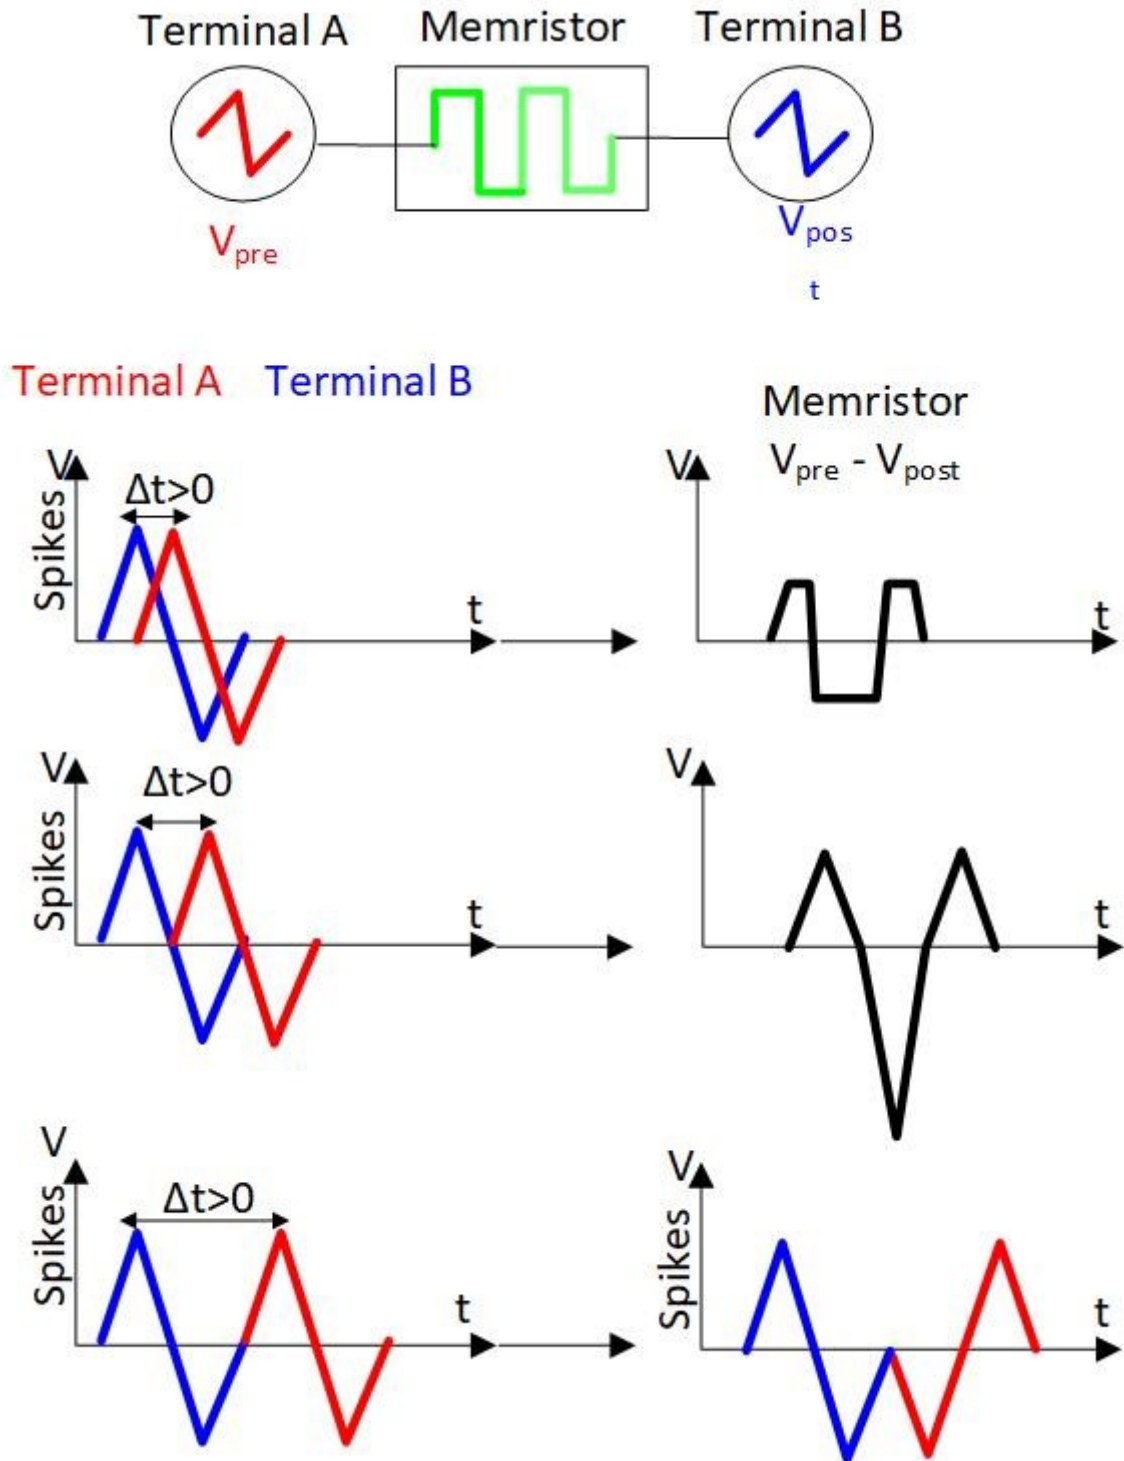

**Figure S9.** Illustration of final pulses shape on memristor devices, depends on time difference.

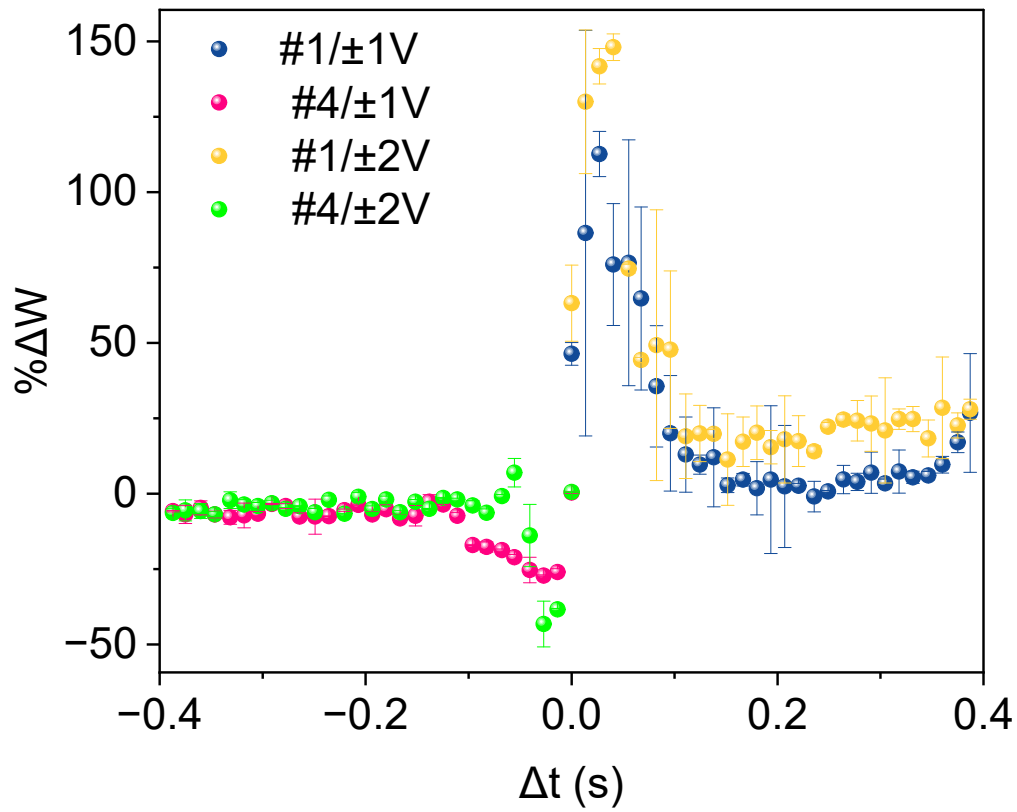

**Figure S10.** STDP of 4-CNpyBiI<sub>3</sub> with RT-pulse (#1 and #4) ; pulse amplitude to ( $\pm 1$  V) and pulse amplitude to ( $\pm 2$  V).

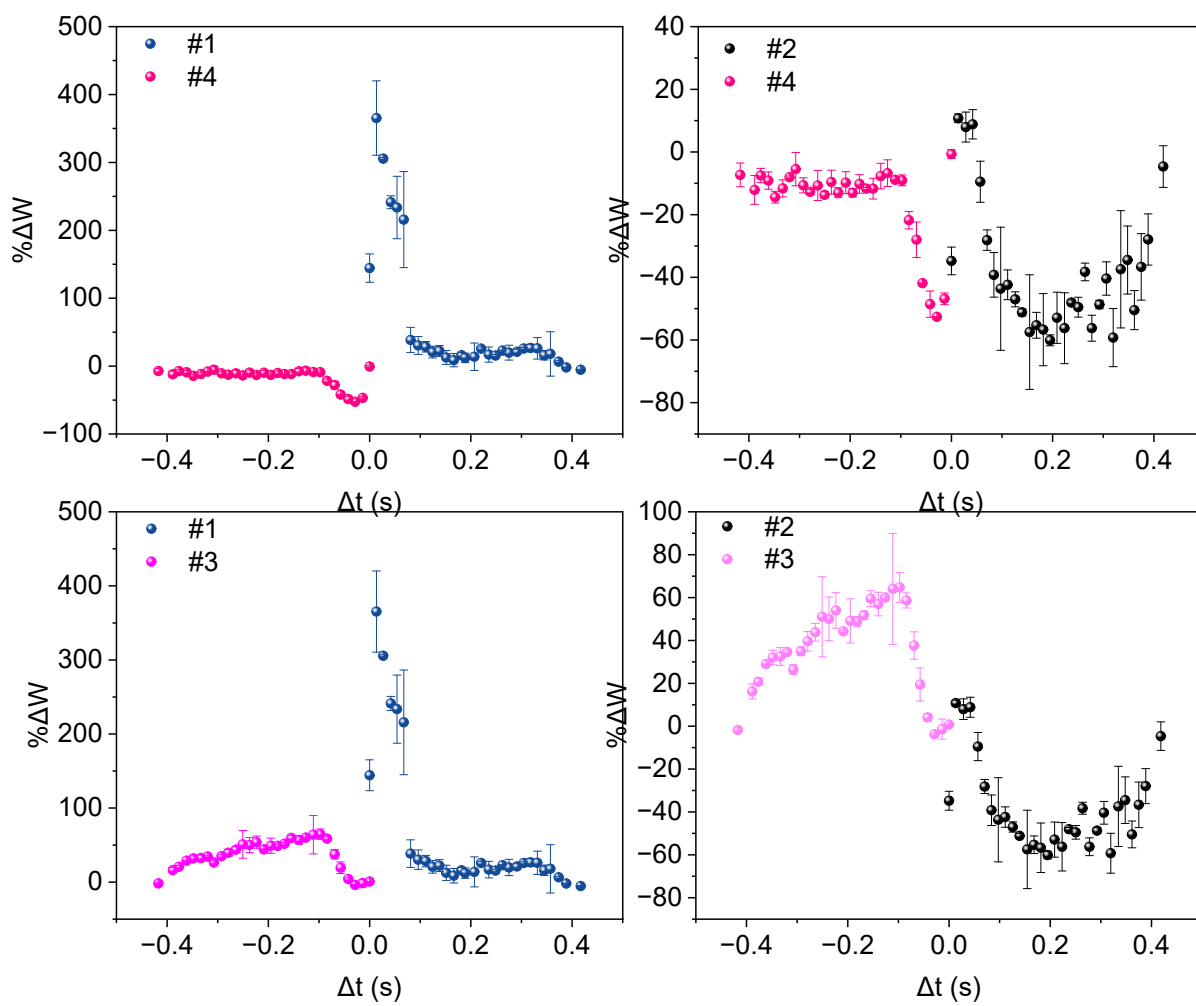

**Figure S11.** STDP of 4-MepyBiI<sub>3</sub> in different pulse polarities with  $\pm 1$  V amplitude.

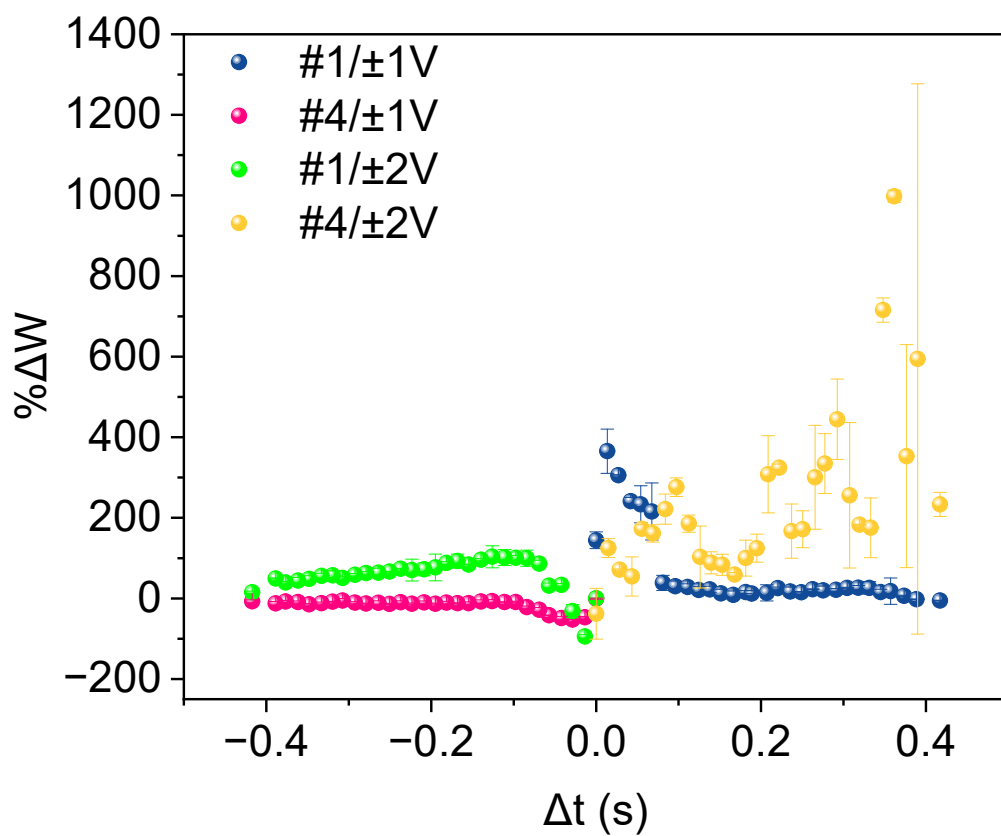

**Figure S12.** STDP of 4-MepyBiI<sub>3</sub> with RT-pulse (#1 and #4) ; pulse amplitude to ( $\pm 1$  V) and pulse amplitude to ( $\pm 2$  V).
